# Supplementary material for: A La3+-doped TiO2 nanoparticle decorated functionalized-MWCNT catalyst: novel electrochemical non-enzymatic sensing of paraoxon-ethyl
Source: Royal Society of Chemistry journal article supplement (doi:10.1039/d0na00260g), 2020-01-01
Supplement: d0na00260g1.pdf [file d0na00260g1.pdf]

*Supporting Information*

**La<sup>3+</sup> doped TiO<sub>2</sub> nanoparticles decorated functionalized-  
MWCNTs catalyst: a novel electrochemical non-enzymatic  
sensing of paraoxon-ethyl**

**Raja Nehru<sup>a</sup> and Shen-Ming Chen<sup>a\*</sup>**

<sup>a</sup>Department of Chemical Engineering and Biotechnology, National Taipei University  
of Technology, Taipei 10608, Taiwan.

\*E-mail: [smchen1957@gmail.com](mailto:smchen1957@gmail.com), [nrajache@gmail.com](mailto:nrajache@gmail.com)

## Result and discussion:

UV-DRS:

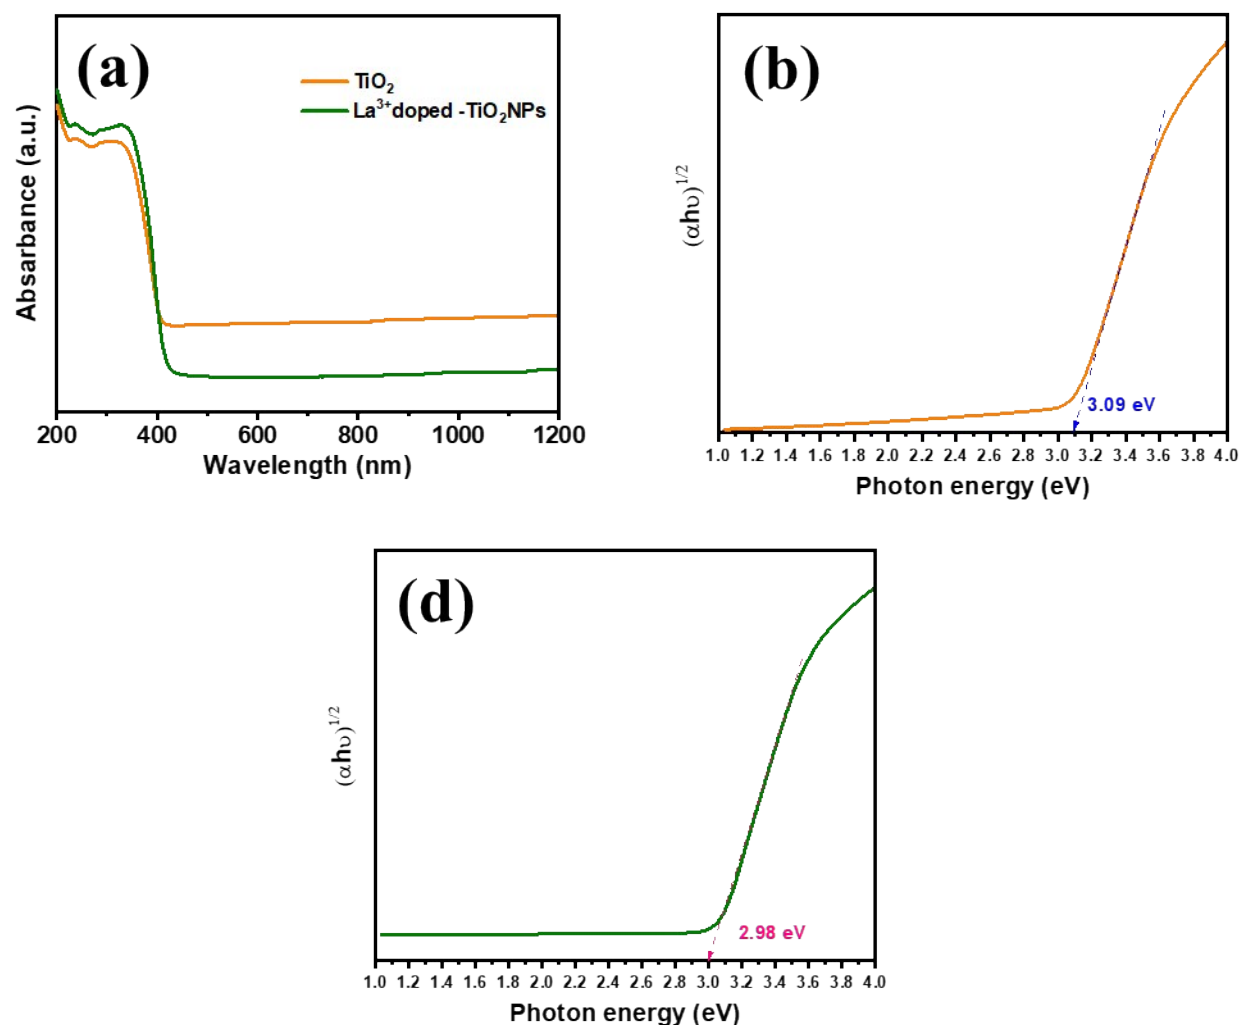

Fig.S1. UV-Vis diffuse reflectance spectra for the undoped and La<sup>3+</sup>-doped TiO<sub>2</sub> NPs.

The UV-Vis diffuse reflectance spectra of undoped and La<sup>3+</sup> doped TiO<sub>2</sub> NPs and their bandgap energy ( $E_g$ ) level, as given in Fig.S1(a-c), which were associated with an indirect transition. It can observe that the La<sup>3+</sup> doping concentration shows the red-shift compared with undoped TiO<sub>2</sub> NPs, indicating that decreasing in the band gap (2.98 eV), while the  $E_g$  of pure TiO<sub>2</sub> was 3.09 eV. The red-shift could attribute to the charge-transfer transition between 4f or 5d electrons of La<sup>3+</sup> doping on Ti<sup>4+</sup> of TiO<sub>2</sub> NPs. Herein, the doping of La<sup>3+</sup> reduced the bandgap while

compared with pure TiO<sub>2</sub>, and eventually increases the catalytic ability to the La<sup>3+</sup> doped TiO<sub>2</sub> NPs.

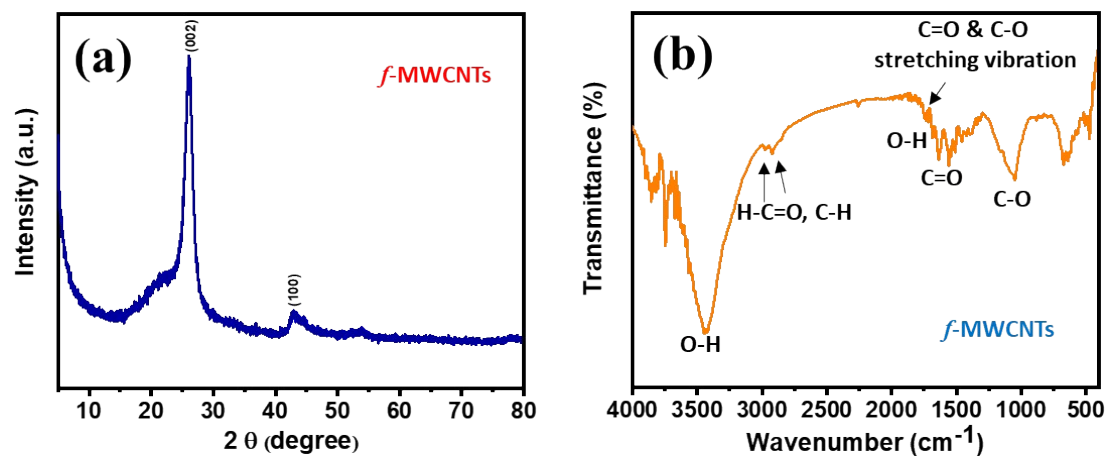

Fig.S2. (a) X-ray powder diffraction pattern and (b) FT-IR spectra of *f*-MWCNTs.

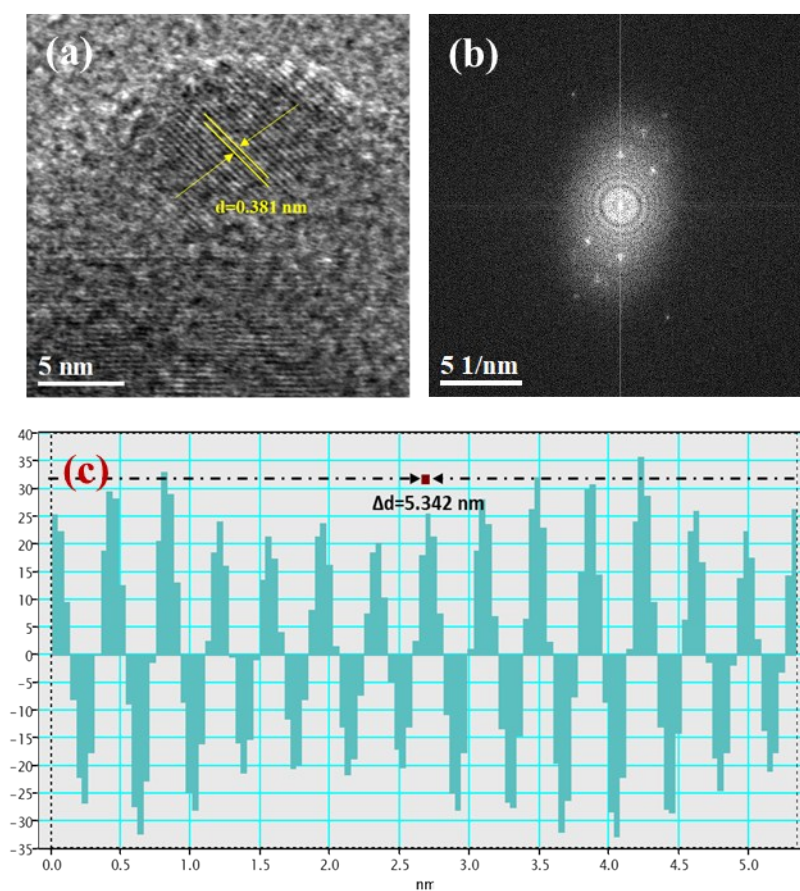

Fig.S3. (a-b) HR-TEM and SAED pattern image of pure-TiO<sub>2</sub> NPs. (c) The TiO<sub>2</sub> NP line profile for the selected line and its inverse FFT image, indicating that its d spacing was 3.81 Å.

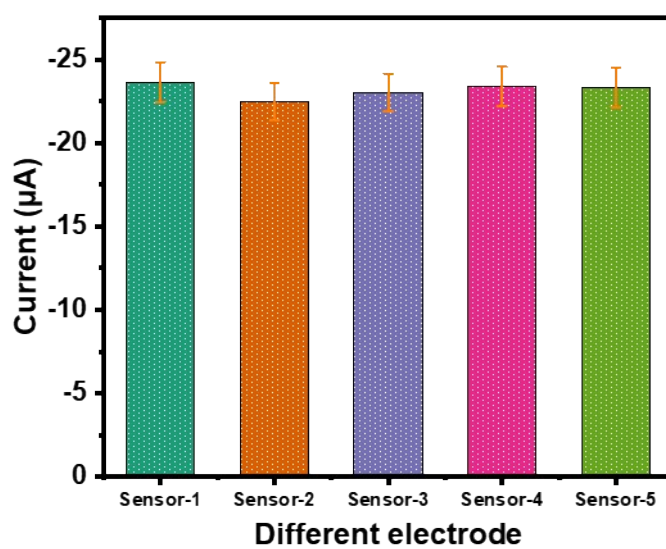

Fig. S4. The reproducibility of different modified electrodes using La<sup>3+</sup> doped TiO<sub>2</sub> NPs decorated *f*-MWCNTs.
